# Supplementary material for: Bacterial Urinary Tract Infection and Early Asymptomatic Bacteriuria in Kidney Transplantation Still Negatively Affect Kidney Transplant Outcomes in the Era of Modern Immunosuppression and Cotrimoxazole Prophylaxis
Source: MDPI journal article supplement (doi:10.3390/biomedicines10112984), 2022-11-20

# **Bacterial Urinary Tract Infection and Early Asymptomatic Bacteriuria in Kidney Transplantation Still Negatively Affect Kidney Transplant Outcomes in the Era of Modern Immunosuppression and Cotrimoxazole Prophylaxis**

Chayanant Santithanmakorn,<sup>1</sup> Jakapat Vanichanan,<sup>2</sup> Natavudh Townamchai,<sup>3,4,5</sup> Kamonwan Jutivorakool,<sup>2</sup> Salin Wattanatorn,<sup>3</sup> Methee Sutherasan,<sup>4,6</sup> Julin Opanuruk,<sup>6</sup> Stephen J. Kerr,<sup>7,8,9</sup> Kearkiat Praditpornsilpa,<sup>3</sup> Yingyos Avihingsanon,<sup>3,4,5</sup> Suwasin Udomkarnjananun<sup>3,4,5</sup>

<sup>1</sup>Department of Medicine, Faculty of Medicine, Chulalongkorn University and King Chulalongkorn Memorial Hospital, Bangkok, Thailand

<sup>2</sup>Division of Infectious Diseases, Department of Medicine, Faculty of Medicine, Chulalongkorn University and King Chulalongkorn Memorial Hospital, Bangkok, Thailand

<sup>3</sup>Division of Nephrology, Department of Medicine, Faculty of Medicine, Chulalongkorn University and King Chulalongkorn Memorial Hospital, Bangkok, Thailand

<sup>4</sup>Excellence Center for Organ Transplantation (ECOT), King Chulalongkorn Memorial Hospital, Thai Red Cross Society, Bangkok, Thailand

<sup>5</sup>Renal Immunology and Transplantation Research Unit, Faculty of Medicine, Chulalongkorn University, Bangkok, Thailand

<sup>6</sup>Department of Surgery, Faculty of Medicine, Chulalongkorn University and King Chulalongkorn Memorial Hospital, Bangkok, Thailand

<sup>7</sup>Biostatistics Excellence Centre, Research Affairs, Faculty of Medicine, Chulalongkorn University, Bangkok, Thailand.

<sup>8</sup>HIV-NAT, Thai Red Cross AIDS Research Centre, Bangkok, Thailand

<sup>9</sup>The Kirby Institute, University of New South Wales, Sydney 2052, Australia.

**Address for Correspondence:** Suwasin Udomkarnjananun, Division of Nephrology, Department of Medicine, Faculty of Medicine, Chulalongkorn University and King Chulalongkorn Memorial Hospital, 1873, Rama IV Road, Bangkok, 10330, Thailand.

**E-mail:** suwasin.u@gmail.com

**Supplementary Table S1:** Incidence of UTI and ASB according to BMI category.

| <b>BMI (kg/m<sup>2</sup>)</b> | <b>No UTI or ASB</b> | <b>ASB</b> | <b>Simple cystitis</b> | <b>Acute pyelonephritis (complicated UTI)</b> |
|-------------------------------|----------------------|------------|------------------------|-----------------------------------------------|
| < 25                          | 189 (86%)            | 35 (83%)   | 8 (73%)                | 93 (79%)                                      |
| 25-29.9                       | 27 (12%)             | 5 (12%)    | 2 (18%)                | 23 (19%)                                      |
| ≥ 30                          | 3 (2%)               | 2 (5%)     | 1 (9%)                 | 2 (2%)                                        |
| Total                         | 219 (100%)           | 42 (100%)  | 11 (100%)              | 118 (100%)                                    |

ASB; asymptomatic bacteriuria; BMI: body mass index; UTI; urinary tract infection

**Supplementary Table S2:** Comparison between patients with simple cystitis, acute pyelonephritis, and asymptomatic bacteriuria that did not progress to UTI.

| Variables at the time of transplantation             | ASB not progress to UTI (n = 9) | Simple cystitis (n = 11) | Acute pyelonephritis (n = 118) | p-value |
|------------------------------------------------------|---------------------------------|--------------------------|--------------------------------|---------|
| Age, years (mean±SD)                                 | 52±15                           | 45±11                    | 45±12                          | 0.218   |
| Female, n (%)                                        | 7 (78)                          | 9 (82)                   | 68 (58)                        | 0.163   |
| BMI, kg/m <sup>2</sup> (mean±SD)                     | 21.9±3.4                        | 22.6±4.7                 | 21.8±3.6                       | 0.816   |
| Mode of RRT, n (%)                                   |                                 |                          |                                | 0.493   |
| Preemptive                                           | 1 (11)                          | 0 (0)                    | 3 (3)                          |         |
| Hemodialysis                                         | 8 (89)                          | 10 (91)                  | 103 (87)                       |         |
| Peritoneal dialysis                                  | 0 (0)                           | 1 (9)                    | 12 (10)                        |         |
| Dialysis vintage, years (median, Q1-Q3)              | 3.1 (0.5-3.8)                   | 5.0 (1.8-7.3)            | 3.6 (1.5-6.3)                  | 0.343   |
| Previous kidney transplantation, n (%)               | 1 (11)                          | 1 (9)                    | 6 (5)                          | 0.672   |
| Recipient diabetes mellitus, n (%)                   | 4 (44)                          | 2 (18)                   | 20 (17)                        | 0.126   |
| Cause of kidney disease, n (%)                       |                                 |                          |                                | 0.821   |
| Glomerulonephritis                                   | 2 (22)                          | 5 (45)                   | 41 (35)                        |         |
| Diabetic kidney disease                              | 3 (33)                          | 1 (9)                    | 15 (13)                        |         |
| Hypertensive nephrosclerosis                         | 1 (11)                          | 2 (18)                   | 11 (9)                         |         |
| Cystic kidney disease                                | 0 (0)                           | 0 (0)                    | 5 (4)                          |         |
| Urinary tract obstruction/reflux nephropathy         | 0 (0)                           | 0 (0)                    | 3 (3)                          |         |
| Unknown                                              | 3 (33)                          | 3 (27)                   | 43 (36)                        |         |
| Donor age, years (mean±SD)                           | 43±7                            | 36±14                    | 38±12                          | 0.429   |
| Deceased donor, n (%)                                | 3 (33)                          | 6 (55)                   | 72 (61)                        | 0.239   |
| Donor serum Cr, mg/dL (mean±SD)                      | 1.4±1.0                         | 1.5±0.3                  | 1.5±1.2                        | 0.998   |
| HLA mismatch (mean±SD)                               | 2.5±0.7                         | 3.0±1.5                  | 2.9±1.6                        | 0.729   |
| PRA >50%, n (%)                                      | 2 (22)                          | 3 (27)                   | 21 (18)                        | 0.718   |
| ABO incompatible transplantation, n (%)              | 1 (11)                          | 0 (0)                    | 18 (15)                        | 0.363   |
| Total ischemic time >12 hours, %                     | 4 (44)                          | 6 (55)                   | 66 (56)                        | 0.469   |
| Delayed graft function, n (%)                        | 2 (22)                          | 3 (27)                   | 32 (27)                        | 0.927   |
| Anti-thymocyte globulin induction, n (%)             | 2 (22)                          | 3 (27)                   | 19 (16)                        | 0.473   |
| Time to remove Foley catheter, days (median, Q1-Q3)  | 7 (7-7)                         | 7 (7-7)                  | 7 (7-7)                        | 0.725   |
| Time to remove drainage tube, days (median, Q1-Q3)   | 8 (8-8)                         | 8 (7-8)                  | 8 (8-9)                        | 0.684   |
| Time to remove double J stent, days (median, Q1-Q3)  | 23 (22-45)                      | 30 (17-39)               | 28 (21-42)                     | 0.729   |
| eGFR at 1 year, mL/min/1.73 m <sup>2</sup> (mean±SD) | 56±21                           | 54±21                    | 59±20                          | 0.778   |
| eGFR at 3 year, mL/min/1.73 m <sup>2</sup> (mean±SD) | 56±18                           | 56±22                    | 58±23                          | 0.939   |
| Graft survival function at 1 year                    | 0.89                            | 1.00                     | 0.97                           | -       |
| Graft survival function at 5 year                    | 0.89                            | 0.91                     | 0.90                           | -       |
| Patient survival function at 1 year                  | 0.89                            | 1.00                     | 0.97                           | -       |
| Patient survival function at 5 year                  | 0.89                            | 0.90                     | 0.91                           | -       |

ASB, asymptomatic bacteriuria; BMI, body mass index, HLA; human leukocyte antigen, PRA; panel reactive antibody, UTI; urinary tract infection

**Supplementary Figure S1:** Study flow diagram

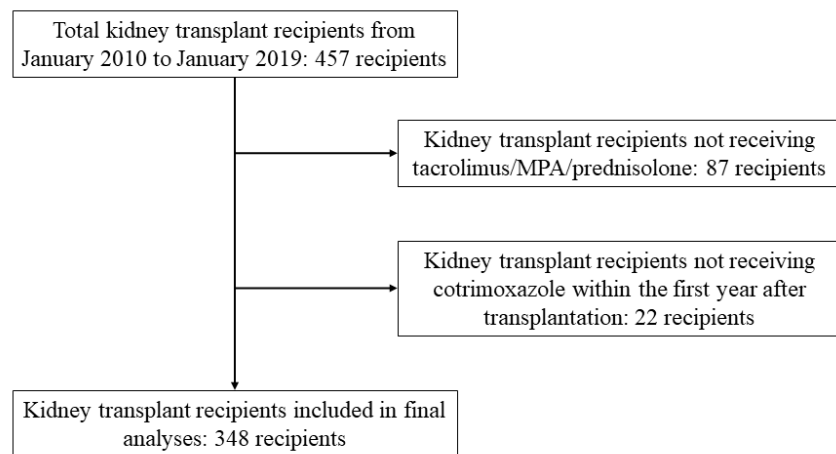

Supplement: s1 [file s1]
